# Supplementary material for: Growing topography due to contrasting rock types in a tectonically dead landscape
Source: Copernicus journal article supplement (doi:10.5194/esurf-2020-68), 2020-08-25
Supplement: Supplementary file 1 [file esurf-2020-68-supplement.zip]

# Growing topography due to contrasting rock types in a tectonically dead landscape

Daniel Peifer<sup>1,2</sup>, Cristina Persano<sup>1</sup>, Martin D. Hurst<sup>1</sup>, Paul Bishop<sup>1</sup>, Derek Fabel<sup>3</sup>

<sup>1</sup>School of Geographical and Earth Sciences, University of Glasgow, Glasgow, G12 8QQ, UK

5 <sup>2</sup>CAPES Foundation, Ministry of Education of Brazil, Brasilia - DF 70040-020, Brazil

<sup>3</sup>Scottish Universities Environmental Research Centre, East Kilbride, G75 0QF, UK

*Correspondence to:* Daniel Peifer (peiferdaniel@gmail.com)

## 1 Contents

### Supplementary Figures:

10 **Figure S1.** Comparison between the drainage network used in this study and Brazil's National Water Agency (ANA) drainage network based on topographic maps developed using aerophotogrammetry.

**Figure S2.** Bivariate regressions between catchment-averaged mean slope angle and local relief (A, C, E), and catchment-averaged normalised channel steepness and local relief (B, D, F).

**Figure S3.** Bivariate regressions between catchment-averaged elevation and mean annual precipitation rates.

15 **Figure S4.** Log-linear correlations between basin area and denudation rates (panel A), and basin area and geomorphic parameters (panels B-D).

**Figure S5.** Scatter plot between catchment-averaged fluvial erosion efficiency coefficient ( $K$ ) against mean annual precipitation rates.

## References cited

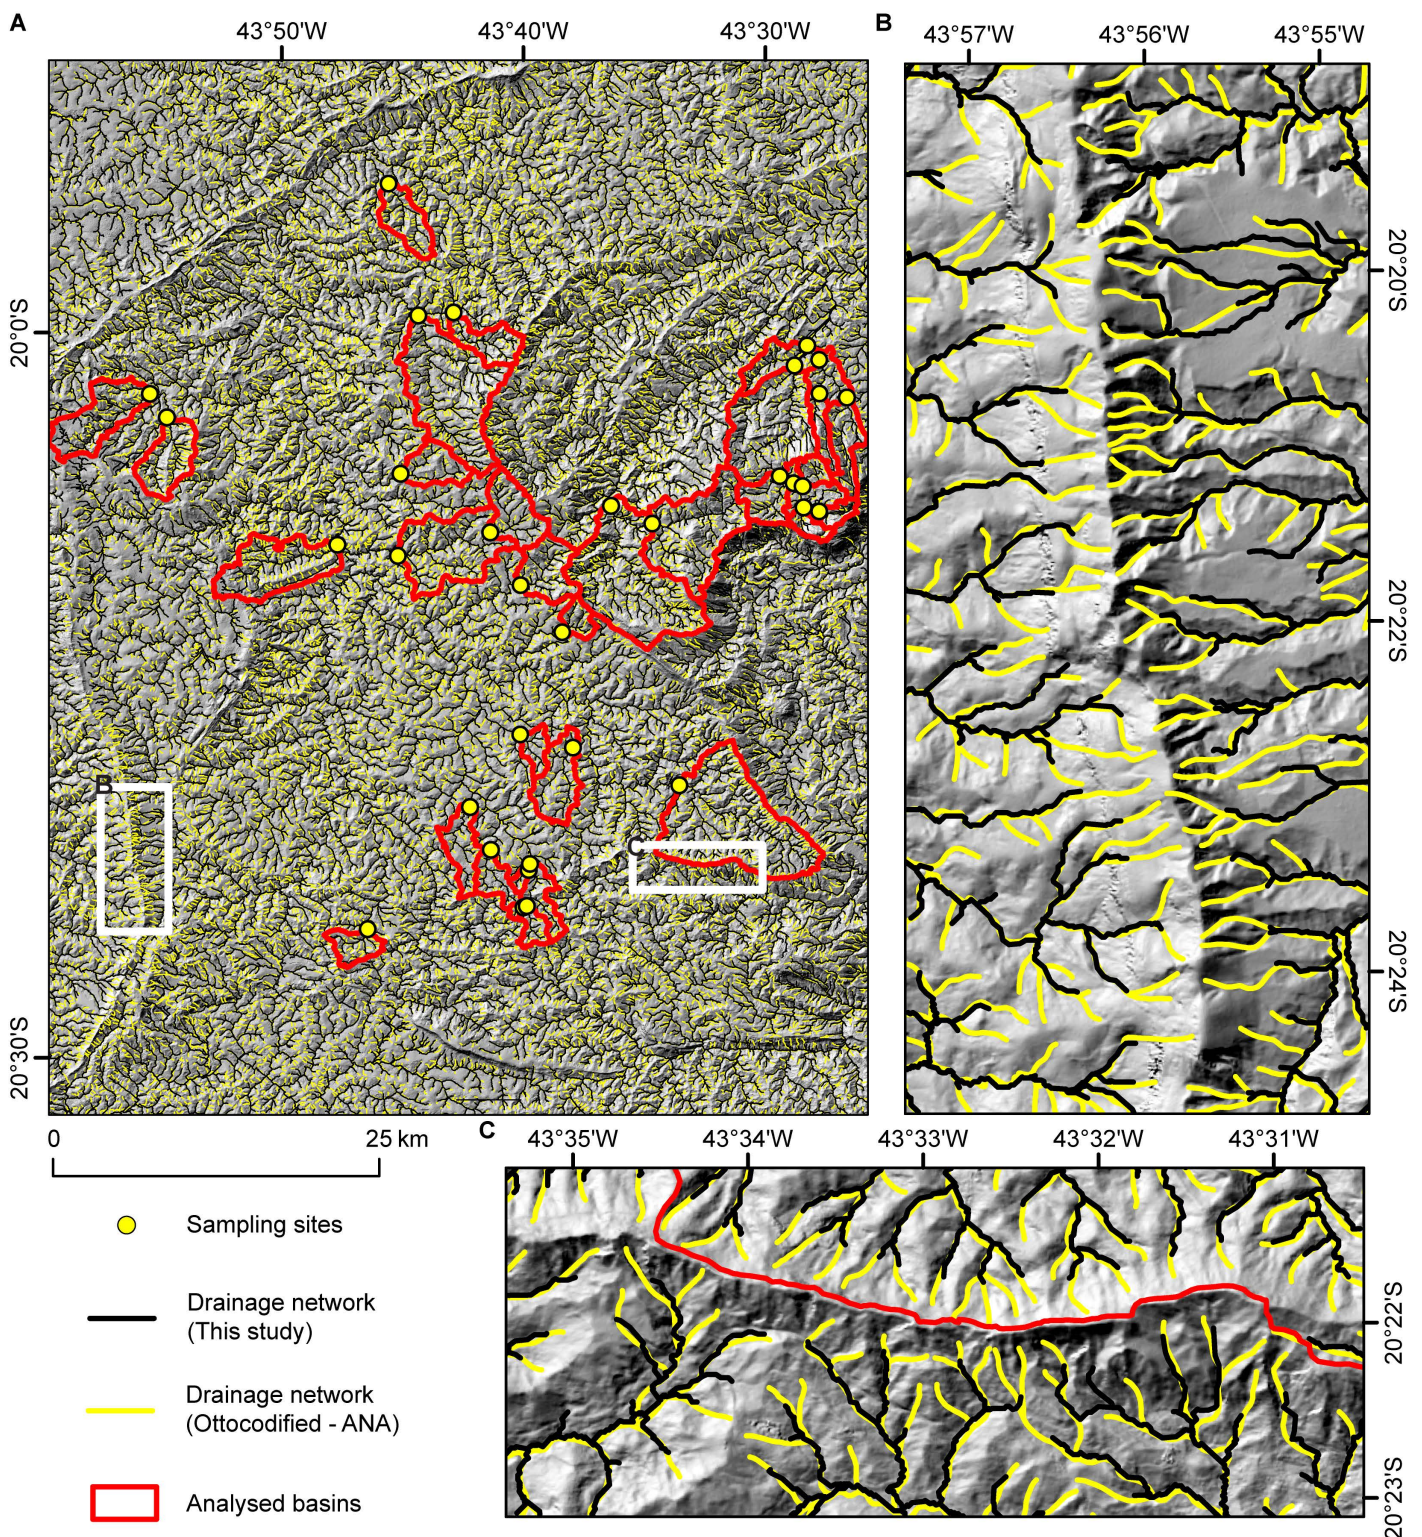

20 **Figure S1: Comparison between the drainage network used in this study and Brazil's National Water Agency (ANA) drainage network based on topographic maps developed using aerophotogrammetry.** Note that channel heads in our drainage network, extracted using an area threshold of 0.5 km<sup>2</sup>, are located, in all cases, downstream of where channel heads are situated in ANA's drainage network. Therefore, we interpret that we used a reasonable contributing area for extracting the drainage in the study area. Panels B and C were developed using a numerical scale of 1:80,000. Data source for ANA's drainage network: ANA (2017).



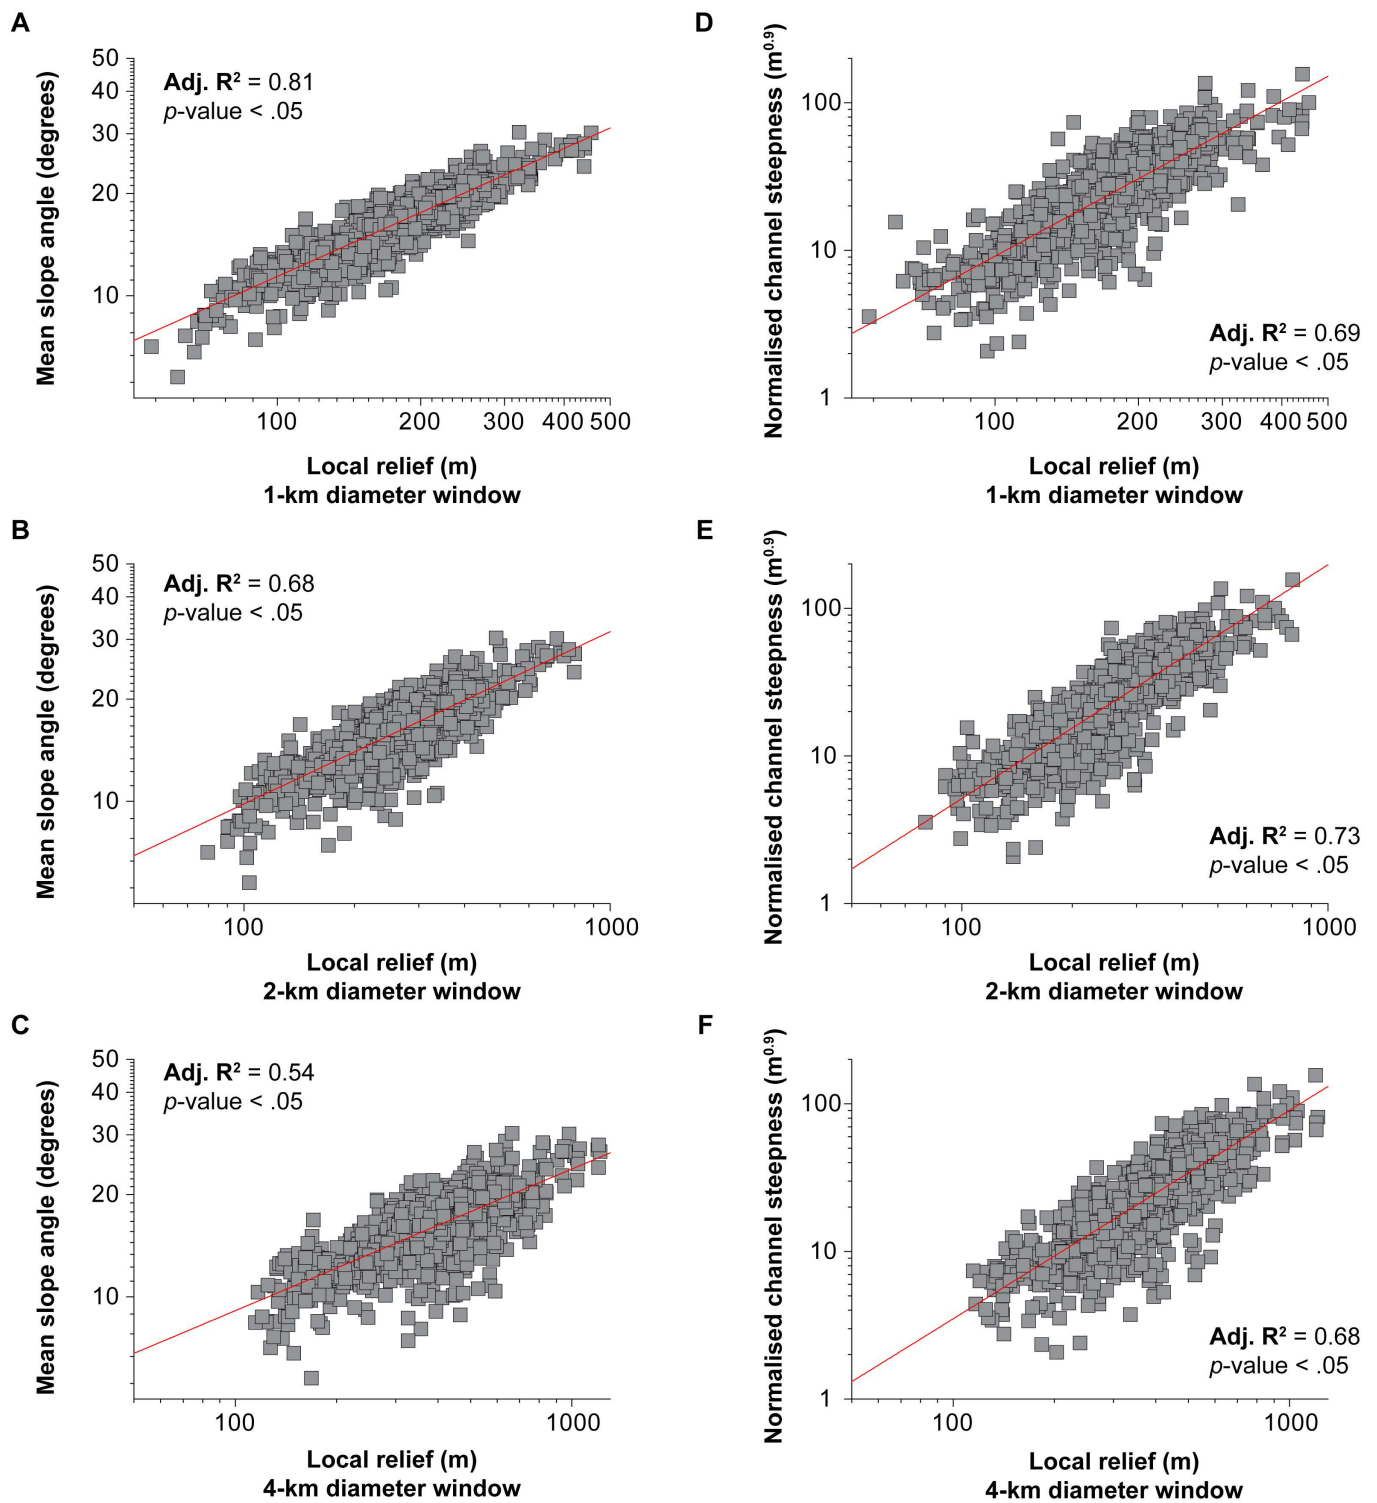

25 **Figure S2: Bivariate regressions between catchment-averaged mean slope angle and local relief (A, C, E), and catchment-averaged normalised channel steepness and local relief (B, D, F).** The diameter of the circular window used for the calculation of local relief is: (A, D) 1 km, (B, E) 2 km, (C, F) 4 km. Increasing the window diameter decreases the  $R^2$  of local relief against mean slope angle. In contrast, the 2-km diameter window local relief dataset exhibits the highest  $R^2$  with the normalised channel steepness (D); this is thus the window we used in the study. Grey circles represent every basin with order higher than 2nd-order for the QF ( $n = 3,155$ ).

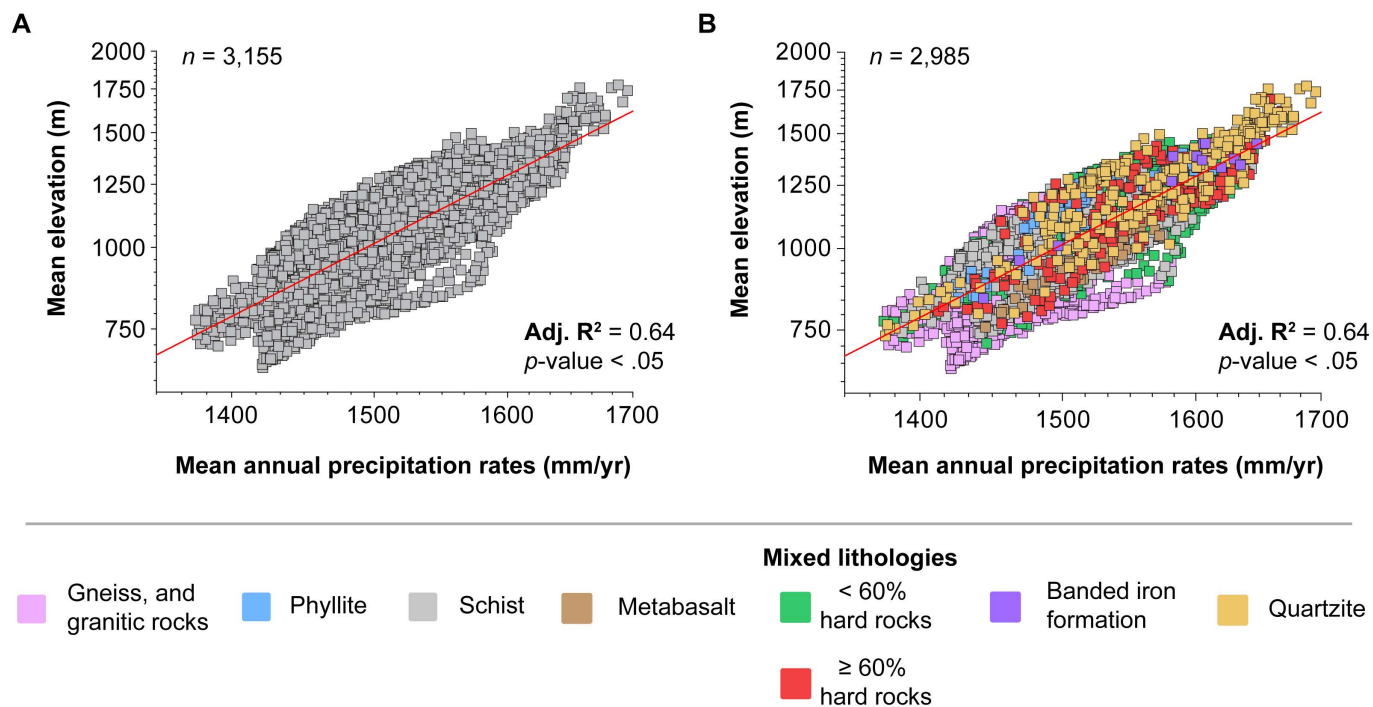

30 **Figure S3: Bivariate regressions between catchment-averaged elevation and mean annual precipitation rates.** Panel (A) represents all catchments in the study area with stream-order higher than second-order while panel (C) shows catchments underlain by main lithologies exposed in the study area. Mixed lithologies refer to catchments where a single rock-type does not account for  $\geq 75\%$  of the catchment area.

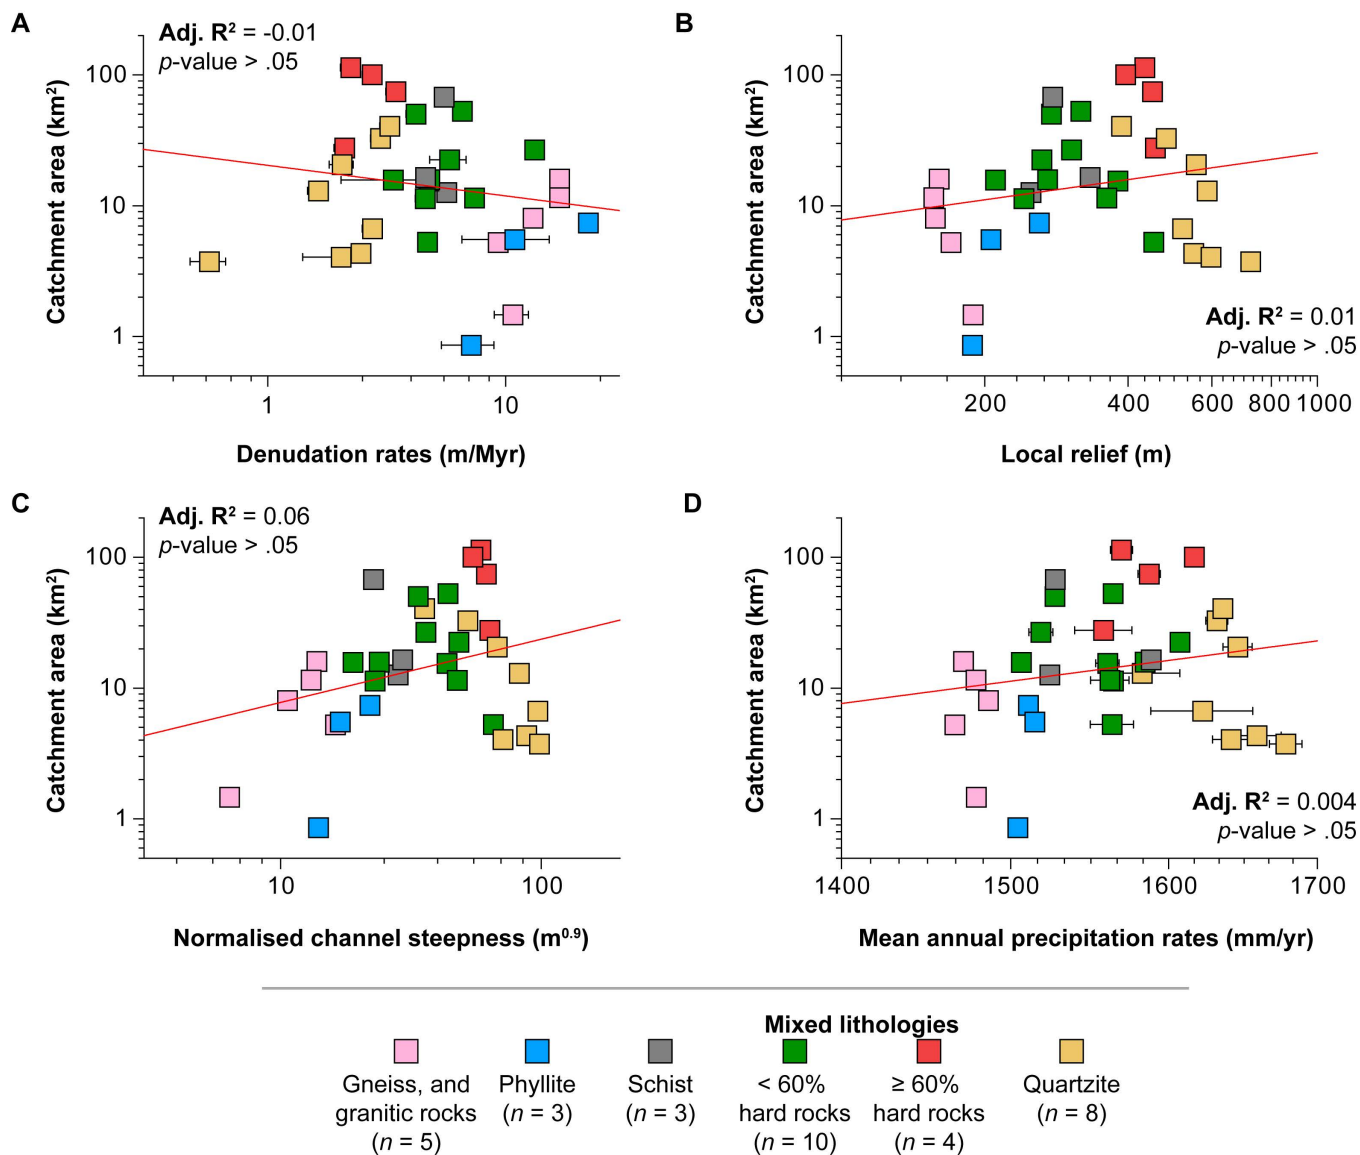

**Fig. S4: Log-linear correlations between basin area and denudation rates (panel A), and basin area and geomorphic parameters (panels B-D).** Note that none of the relationships between catchment area and geomorphic parameters is statistically significant at a .05 level. X-error bars represent external uncertainty in denudation rates in panel (A), and the standard error of the mean in panels (B), (C), and (D).

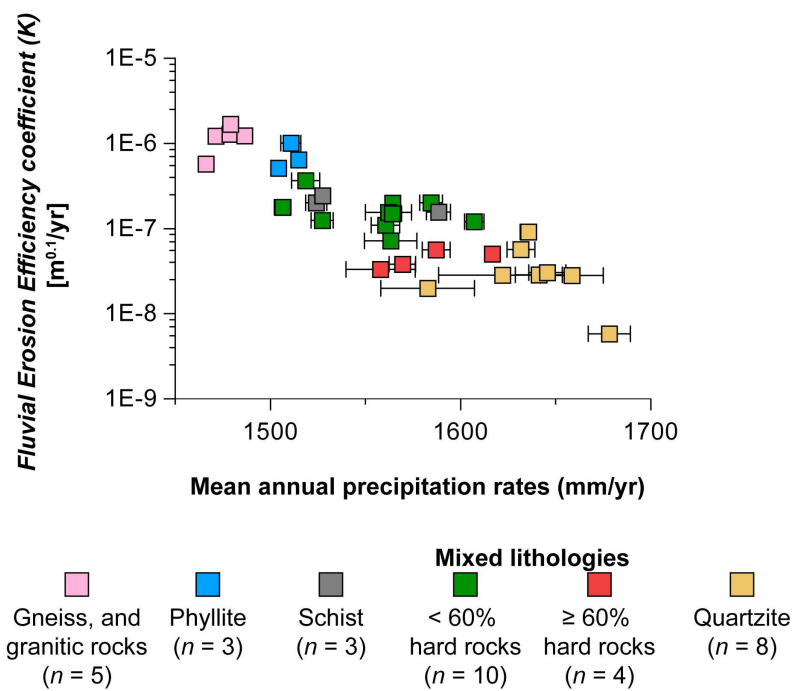

**Figure S5: Scatter plot between catchment-averaged fluvial erosion efficiency coefficient ( $K$ ) against mean annual precipitation rates.** Note that we assumed  $n = 1$ . X-error bars represent the standard error of the mean.

## References

- 40 Agência Nacional de Águas (Brasil): Base Hidrográfica Ottocodificada da Bacia do Rio São Francisco, <https://metadados.ana.gov.br/geonetwork/srv/pt/metadata.show?id=438&currTab=distribution>, last access: 22 July 2020, 2017.
